# Supplementary material for: Uncovering the decomposition mechanism of nitrate ester plasticized polyether (NEPE): a neural network potential simulation
Source: Royal Society of Chemistry journal article supplement (doi:10.1039/d4cp02223h), 2024-01-01
Supplement: d4cp02223h1.pdf [file d4cp02223h1.pdf]

## Supporting information (SI)

### Uncovering the decomposition mechanism of nitrate esters plasticized polyether (NEPE): A neural network potential simulation

Mingjie Wen <sup>a</sup>, Juntao Shi <sup>b</sup>, Xiaoya Chang <sup>a</sup>, Jiahe Han <sup>a</sup>, Kehui Pang <sup>a</sup>, Dongping Chen <sup>a</sup>, Qingzhao Chu <sup>a,\*</sup>

<sup>a</sup> State Key Laboratory of Explosion Science and Safety Protection, Beijing Institute of Technology, Beijing, 100081, China;

<sup>b</sup> National Key Laboratory of Aerospace Chemical Power, Xiangyang, 441000, Hubei Province, China.

---

In the supplementary information, we present:

- **Fig. S1** Statistics of all sampled energy and force of PEG, NG, BTTN, NG-BTTN, and PEG-NG-BTTN in NNP training within the temperature range of 300-4000 K.
- **Fig. S2** Minor gaseous species produced during the decomposition of PEG (a), NG(b), BTTN (c), NG-BTTN (d), and PEG-NG-BTTN (e) predicted by the NNP model.
- **Fig. S3** Gaseous species generated during the decomposition of NEPE matrix different mass ratios 1:2:2 (a), 1:1:1 (b), and 2:1:1 (c) of PEG, NG, and BTTN components predicted by the NNP model. Left and right subplots represent the major and minor species, respectively.
- **Fig. S4** Temporal dynamics trajectories of decomposition and the formation of intermediates and products during the thermal decomposition processes of NG (a) and BTTN (b) in the NG-BTTN plasticizer.

---

\* Corresponding author: chuqz@bit.edu.cn



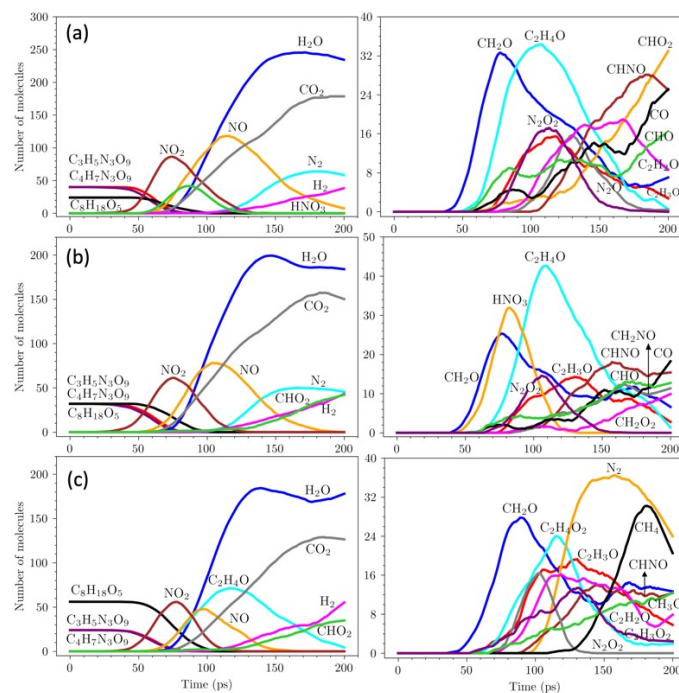

**Fig. S3** Gaseous species generated during the decomposition of NEPE matrix different mass ratios 1:2:2 (a), 1:1:1 (b), and 2:1:1 (c) of PEG, NG, and BTTN components predicted by the NNP model. Left and right subplots represent the major and minor species, respectively.

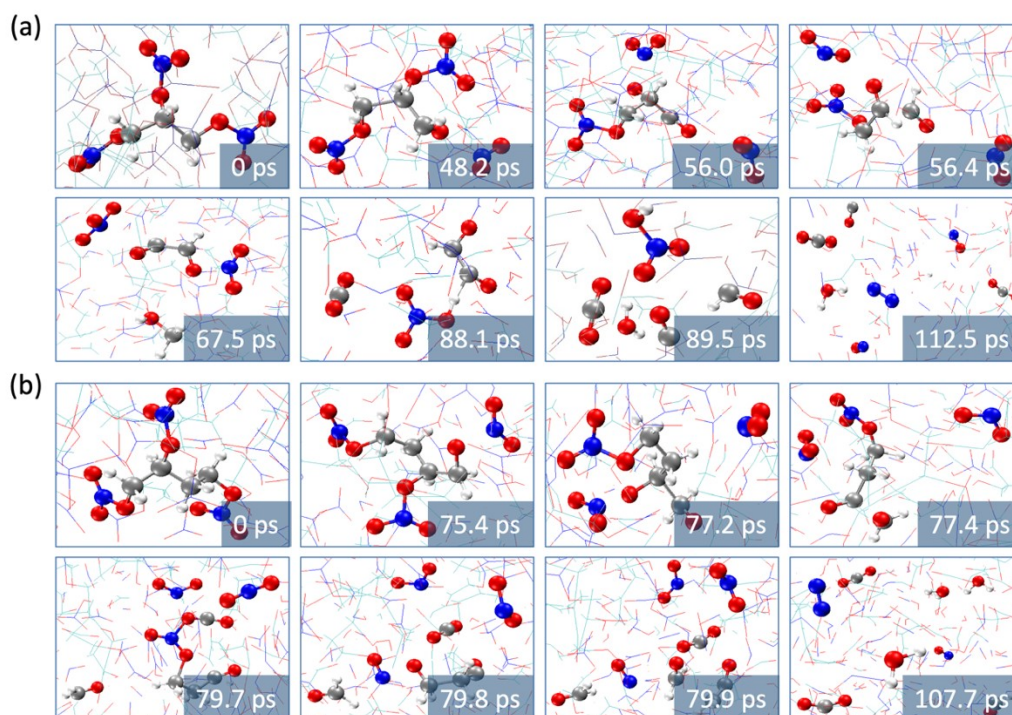

**Fig. S4** Temporal dynamics trajectories of decomposition and the formation of intermediates and products during the thermal decomposition processes of NG (a) and BTTN (b) in the NG-BTTN plasticizer.
